# Supplementary material
Source: publisher figshare collection journal article supplement (https://tandf.figshare.com/ndownloader/files/22658027)
Supplement: Supplementary file 1 [file 22658027]

Structural, Hirshfeld surface and *in vitro* cytotoxicity evaluation of five newN-aryl-N'*-*alkoxycarbonyl thiocarbamide derivatives

Sunil K. Pandey a, Seema Pratap a*, Sunil K. Rai b, Gaetano Marverti c

a Department of Chemistry (M.M.V), Banaras Hindu University, Varanasi−221005, UP, India

bOrganic Chemistry Division, CSIR-National Chemical Laboratory (NCL), Pune-411008, Maharashtra, India

**c**Department of Biomedical, Metabolic and Neural Sciences, University of Modena and Reggio Emilia, 41125 Modena, Italy

Email: [drseemapratap@gmail.com](mailto:drseemapratap@gmail.com)

**
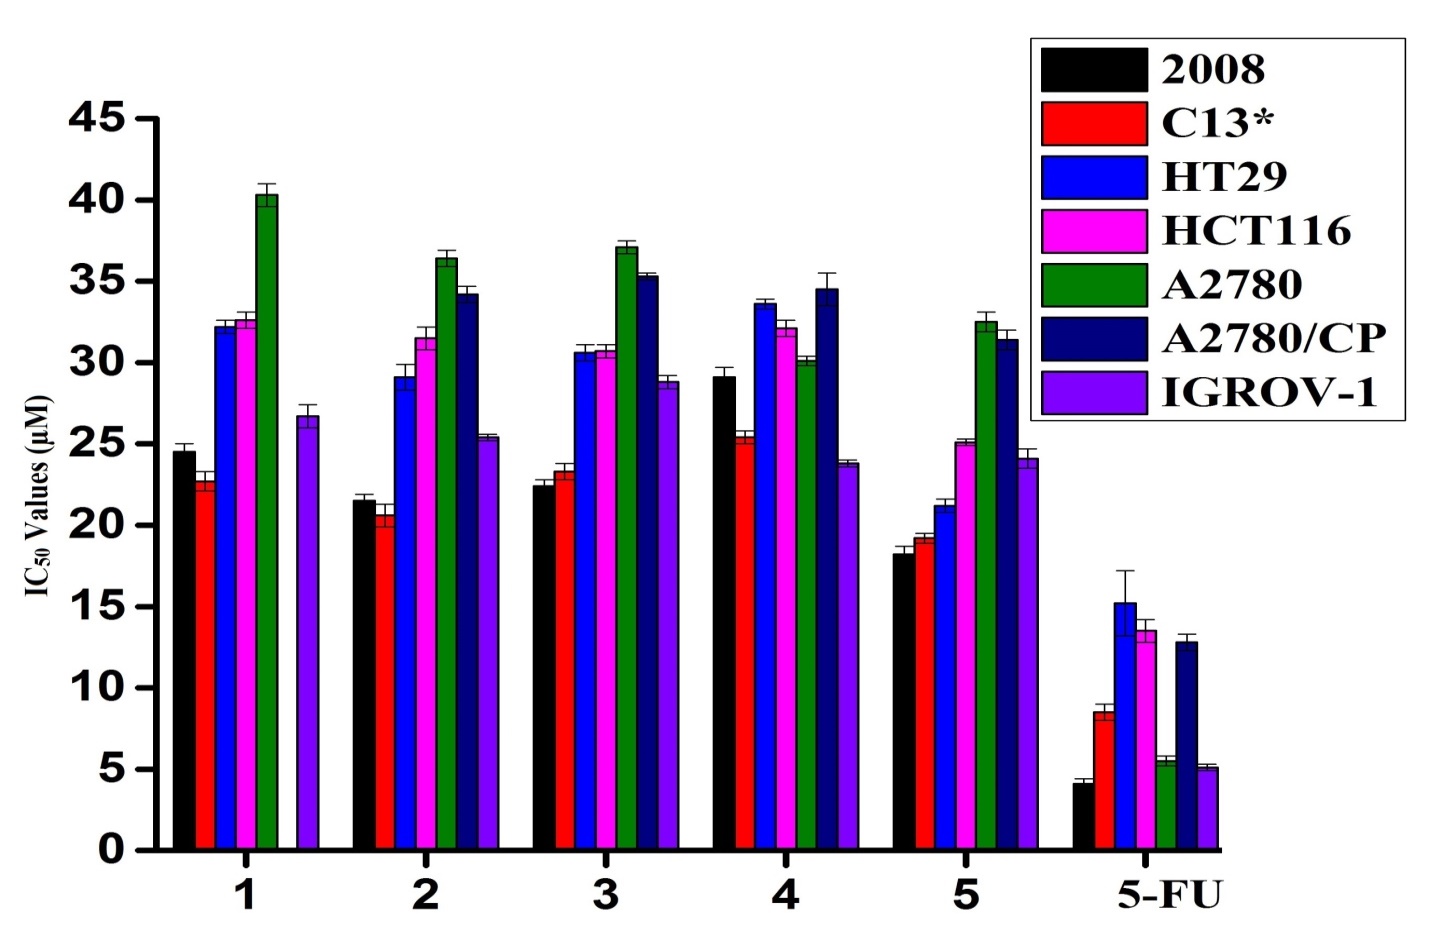
**

**Figure S 1.** Comparative *in vitro* cytotoxicity of compounds **1−5** for a panel of seven human cancer cell lines; Cervical (**2008** and **C13*),** Colorectal (**HT29** and **HCT116**) and Ovarian carcinoma (**A2780**, **A2780/CP** and **IGROV-1**

**Table S1 :** Decomposed fingerprint plots for various interactions in compounds **2** and **5.**

| Compound 2 | |  | Compound 5 | | |
| --- | --- | --- | --- | --- | --- |
| Interactions | **Decomposed fingerprint plots** | **Interactions** | | **Decomposed fingerprint plots** |
|  |  |  | |  |
| C⋯C | 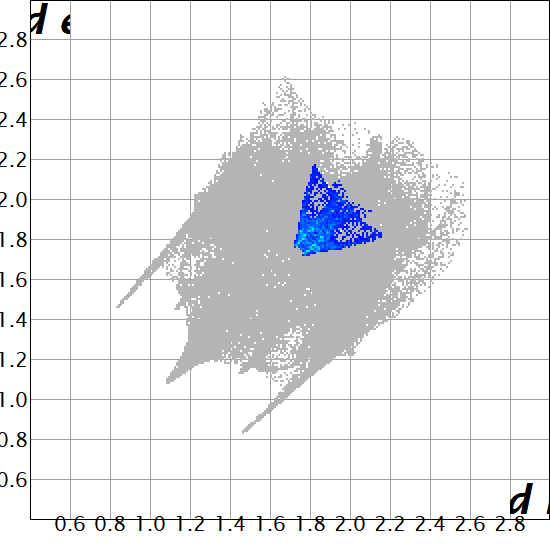 | **C⋯C** | | 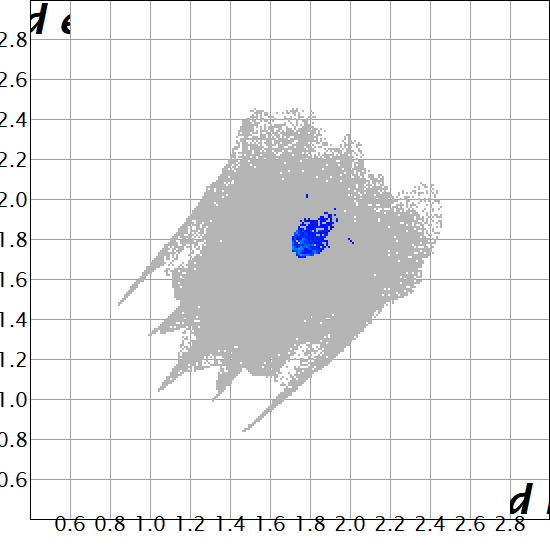 |
| H⋯H | 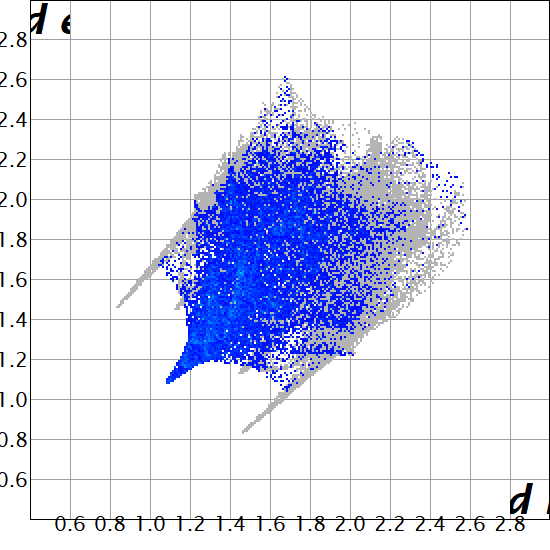 |  | **H⋯H** | | 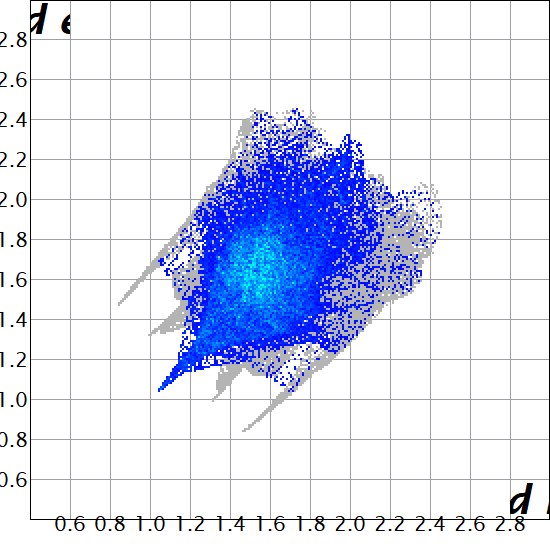 |
| C⋯H | 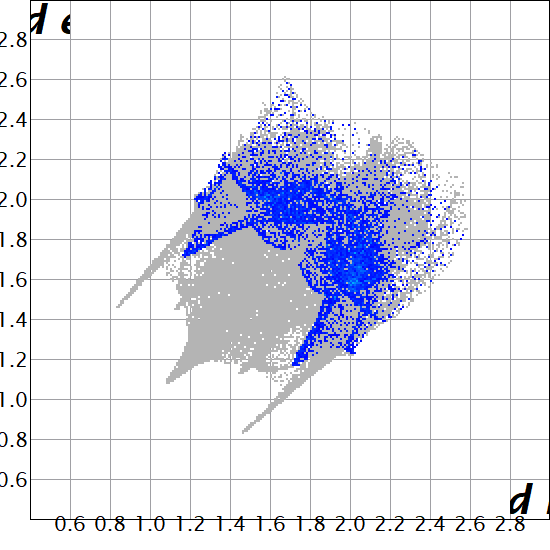 |  | **C⋯H** | | 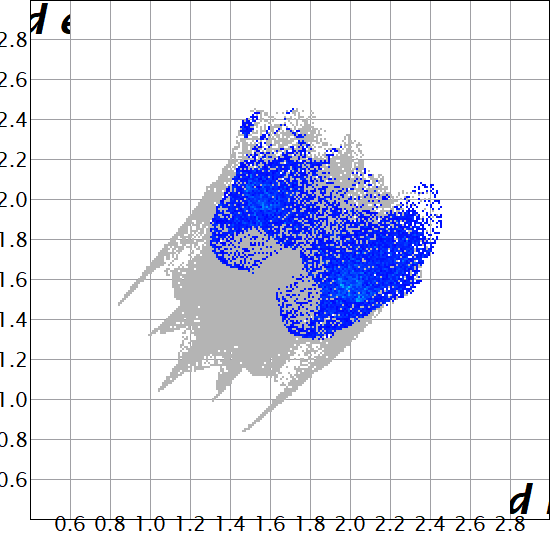 |
| O⋯H | 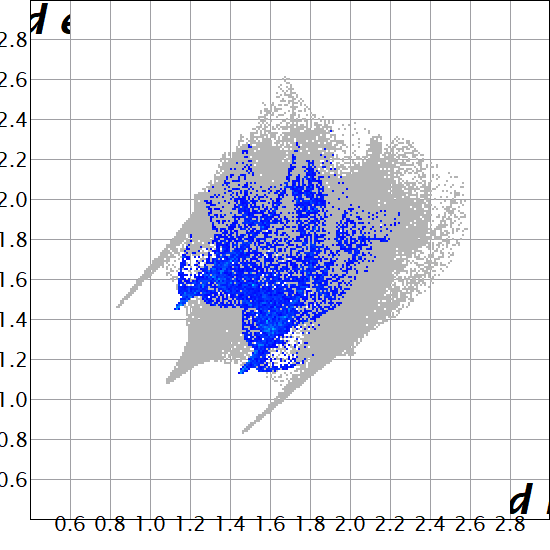 |  | **O⋯H** | | 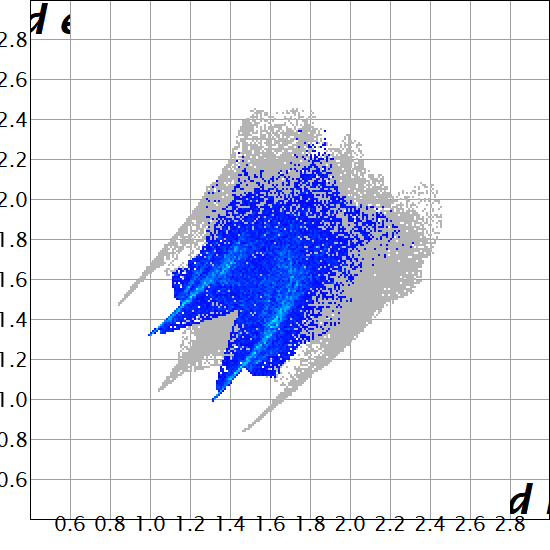 |
| S⋯H | 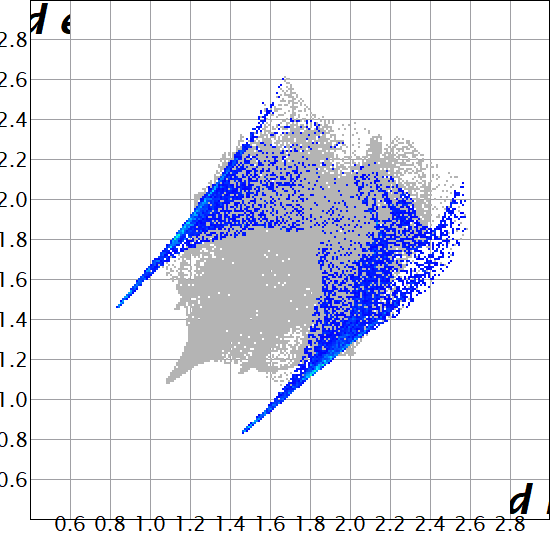 |  | **N⋯H** | | 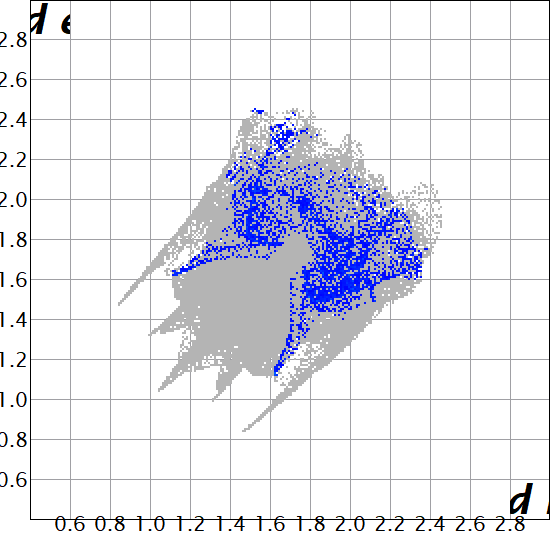 |
| C⋯Cl | 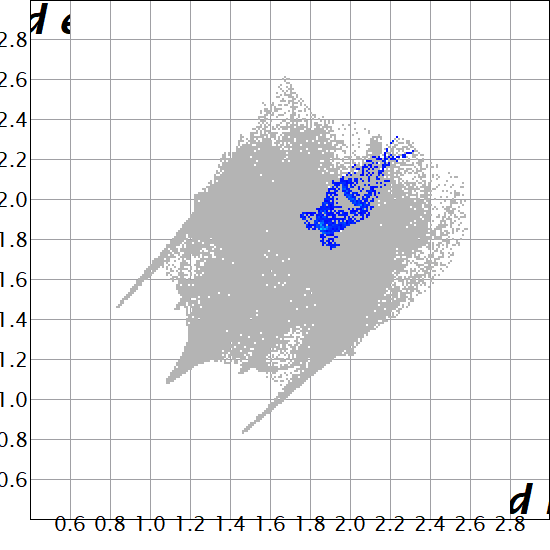 |  | **S⋯H** | | 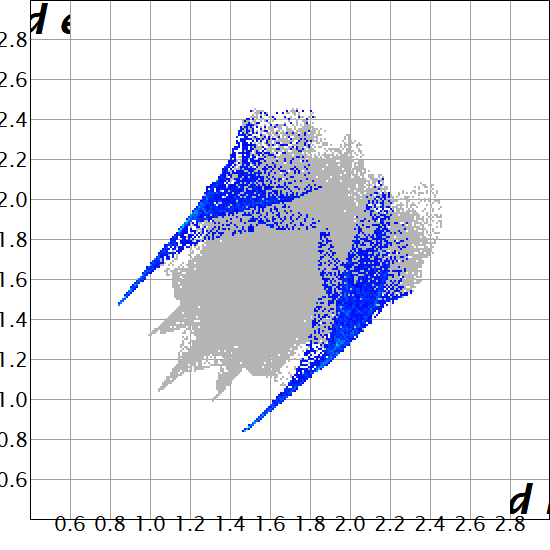 |
| Cl⋯ Cl | 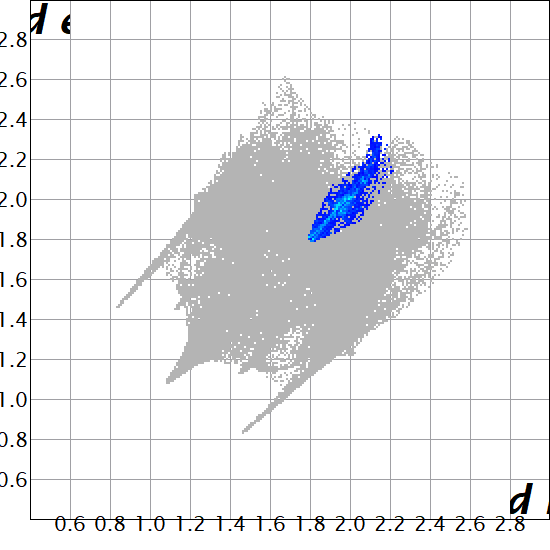 |  |  | **C⋯O** | 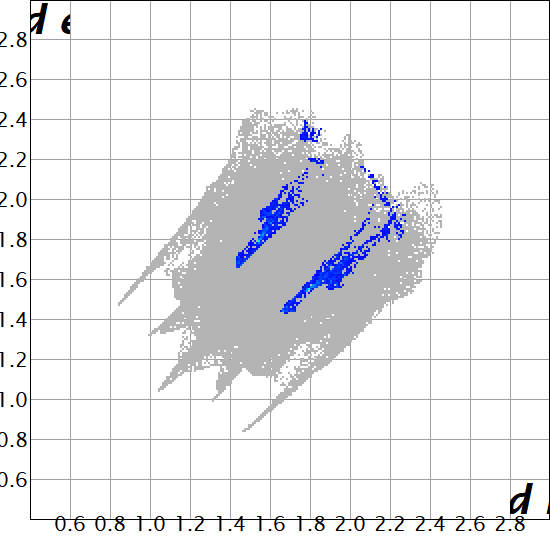 |
| Cl⋯H | 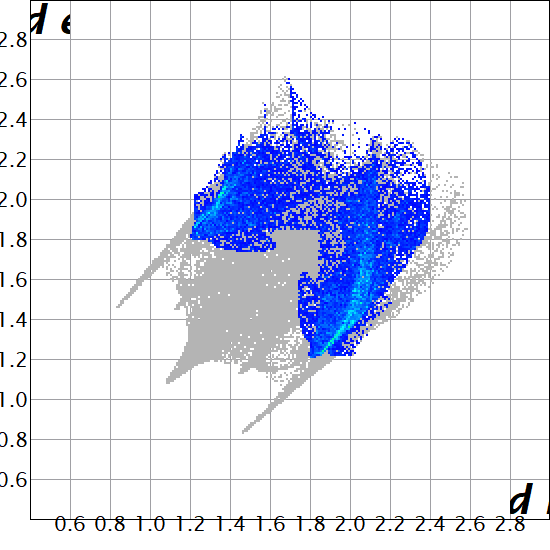 |  |  | **S⋯O** | 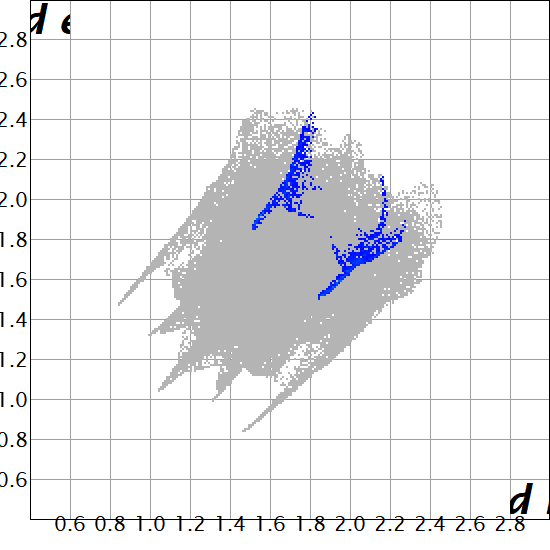 |
| C⋯S | 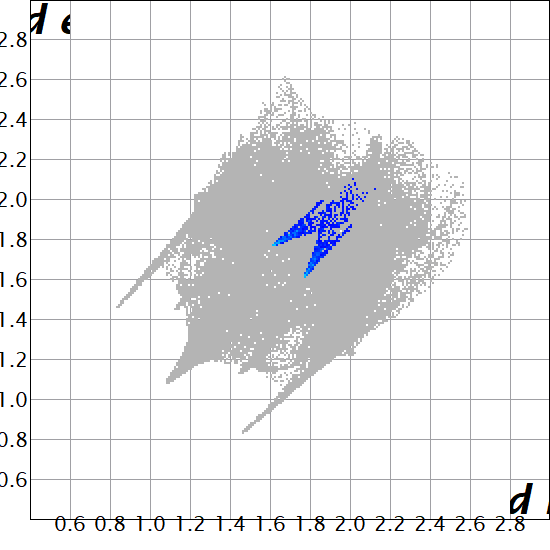 |  |  | **O⋯O** | 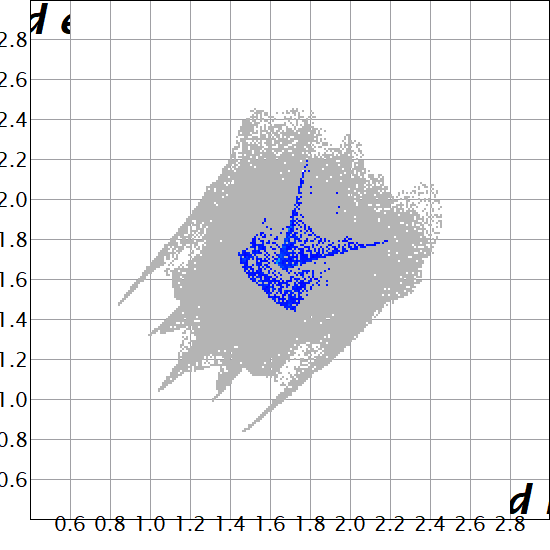 |
| S⋯O | 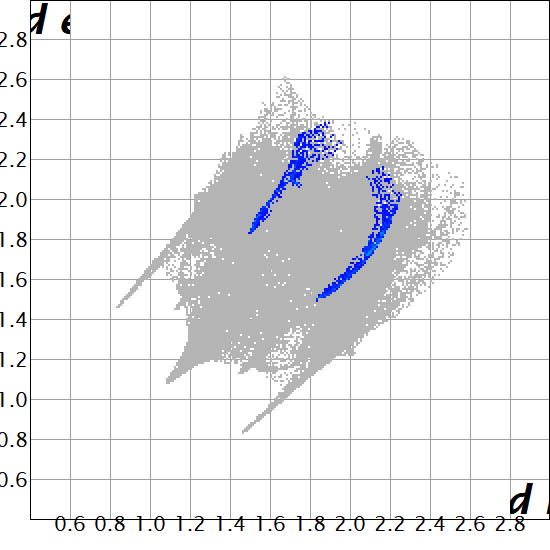 |  |  |  |  |

**Table S 2:** IC50 values (µM) for the compounds **1−5** against seven human cancer cell lines; (cervical **2008** and **C13*),** (colorectal **HT29** and **HCT116**) and (ovarian carcinoma **A2780, A2780/CP** and **IGROV-1)**

| Compounds | 2008 | C13* | HT29 | HCT116 | A2780 | A2780/CP | IGROV-1 |
| --- | --- | --- | --- | --- | --- | --- | --- |
| **1** | 24.5±0.4 | 22.7±0.5 | 33.2±1 | 32.6±0.5 | 40.3±0.6 | 38.3±0.2 | 26.7±0.5 |
| **2** | 21.5±0.3 | 20.6±0.7 | 29.1±0.5 | 31.5±0.3 | 36.4±0.7 | 34.2±0.4 | 25.4±0.6 |
| **3** | 22.4±1 | 23.3±0.5 | 30.6±0.4 | 30.7±0.4 | 37.1±0.2 | 35.3±0.4 | 28.4±0.4 |
| **4** | 29.1±0.6 | 25.4±0.3 | 33.6±0.5 | 32.1±0.9 | 30.1±0.8 | 34.5±0.2 | 23.8±0.5 |
| **5** | 18.2±5 | 19.2±0.3 | 21.2±0.5 | 25.1±0.4 | 32.5±0.6 | 31.4±0.5 | 24.1±3 |
| **5-FU** | 4.1±0.3 | 8.5±0.5 | 15.2±2.1 | 13.5±1.8 | 5.5±0.3 | 12.8±0.5 | 5.1±0.2 |
